# Supplementary material for: In utero electroporation uncovers a distinct population of early dentate gyrus progenitors
Source: Research Square preprint supplement (doi:10.21203/rs.3.rs-6508491/v1), 2025-08-20
Supplement: Supplementary file 1 [file c98371577569f4d1ab4642a5.docx]

| **Antibody Source Primary antibodies Concentration** | | | |
| --- | --- | --- | --- |
| **Primary antibodies** | **Catalog no.** | **Manufacturer** | **Dilution** |
| Rat anti-RFP | 5F8 | Chromotek | 1:1000 |
| Chick anti-GFP | ab13970 | Abcam | 1:1000 |
| Goat anti-Sox2 | AF2018 | R&D | 1:400 |
| Rabbit anti-Tbr2 | ab23345 | Abcam | 1:1000 |
| Goat anti-Prox1 | AF2727 | R&D | 1:1000 |
| Mouse anti-NeuN | MAB377 | Merck | 1:200 |

| **Antibody Source Secondary antibodies Concentration** | | | |
| --- | --- | --- | --- |
| **Secondary antibodies** | **Catalog no.** | **Manufacturer** | **Dilution** |
| Donkey anti-chick Alexa Fluor 488 | 703-546-155 | Jackson Immuno Research | 1:500 |
| Donkey anti-mouse Cy5 | 715-175-151 | Jackson Immuno Research | 1:100 |
| Donkey anti-goat Alexa Fluor 647 | A21447 | Thermo Fisher | 1:500 |
| Donkey anti-rabbit biotin | 711-065-152 | Jackson Immuno Research | 1:100 |
| Donkey anti-rat Alexa Fluor 555 | ab150154 | Abcam | 1:500 |

| **Probe Concentration** | | | |
| --- | --- | --- | --- |
| **Probe name** | **Catalog no.** | **Manufacturer** | **Dilution** |
| Streptavidin Alexa Fluor 405 conjugate | S32351 | Thermo Fisher | 1:100 |
